# Supplementary material for: A multilevel analysis to explain self-reported adverse health effects and adaptation to urban heat: a cross-sectional survey in the deprived areas of 9 Canadian cities
Source: BMC Public Health. 2016 Feb 12;16:144. doi: 10.1186/s12889-016-2749-y (PMC4751716; doi:10.1186/s12889-016-2749-y)
Supplement: Additional file 4: — 3-level multivariate linear regression model of the adaptation index when it is very hot and humid in summer: random part. (DOCX 19 kb) [file 12889_2016_2749_MOESM4_ESM.docx]

**Supplementary table 4:**

**3-level multivariate linear regression model of the adaptation index when it is very hot and humid in summer: random part**

| **Random part** | **M0A** | **M00B** | **(M0-M00)**  **/M0H** | **M000C** | **(M00-M000)**  **/M00H** | **M000:1D** | **(M000-M000:1)**  **/M000** | **M000:12E** | **(M000:1-M000:12)**  **/M000:1H** | **M000:123F** | **(M000:12-M000:123)**  **/M000:12H** |
| --- | --- | --- | --- | --- | --- | --- | --- | --- | --- | --- | --- |
| **σ2 (ES)G** | **σ2 (ES)G** | **σ2 (ES)G** | **σ2 (ES)G** | **σ2 (ES)G** | **σ2 (ES)G** |
| **Levels (L)** |  |  |  |  |  |  |  |  |  |  |  |
| L-DA |  |  |  | 0.022 (0.009) |  | 0.010 (0.005) | 0.55 | 0.010 (0.005) | 0.00 | 0.008 (0.005) | 0.20 |
| L-buildings |  | 0.158 (0.023) |  | 0.138 (0.023) | 0.13 | 0.022 (0.012) | 0.84 | 0.022 (0.012) | 0.00 | 0.020 (0.011) | 0.09 |
| L-individuals | 0.974 (0.023) | 0.806 (0.024) | 0.17 | 0.806 (0.024) | 0.00 | 0.713 (0.021) | 0.12 | 0.713 (0.021) | 0.00 | 0.713 (0.021) | 0.00 |
| **Total** | 0.974 | 0.964 |  | 0.966 |  | 0.745 |  | 0.745 |  | 0.741 |  |
|  |  |  |  |  |  |  |  |  |  |  |  |
| **-2**log likelihood*** | 9 797.84 | 9 610.13 |  | 9 598.39 |  | 7 604.56 |  | 7 604.51 |  | 7 595.20 |  |
| **RVI p values** |  | 0.000 |  | 0.001 |  | 0.000 |  | 0.808 |  | 0.010 |  |
|  |  |  |  |  |  |  |  |  |  |  |  |
| **UnitsJ** |  |  |  |  |  |  |  |  |  |  |  |
| L-DA |  |  |  | 87 |  | 87 |  | 87 |  | 87 |  |
| L-buildings |  | 1 647 |  | 1 647 |  | 1 438 |  | 1 437 |  | 1 437 |  |
| L-individuals | 3 485 | 3 485 |  | 3 485 |  | 2 998 |  | 2 998 |  | 2 998 |  |

AM0 = 1-level null model (individuals, I). BM00 = 2-level null model (I+buildings, B). CM000 = 3-level null model (I+B+DA). DM000:1 = 3-level model with covariables of individual-level. EM000:12 = 3-level model with individual-level and building-level covariables. **F**M000:123 = 3-level model with individual-level, building-level and DA-level covariables. **G** σ2(ES) = variance (standard error). H These proportions represent unexplained (or residual) variance reduction of the adaptation index of health impacts when moving from one model to another. **I**RV: likelihood ratio test. **J** The differences observed between the models are due to missing data for one or more covariables.
